# Supplementary material for: The Polycomb group protein MEDEA controls cell proliferation and embryonic patterning in Arabidopsis
Source: PubMed Central journal article supplement (PMC8279741; doi:10.1016/j.devcel.2021.06.004), 2021-07-12
Supplement: mmc1.pdf [file mmc1.pdf]

**Developmental Cell, Volume 56**

**Supplemental information**

**The *Polycomb* group protein**

**MEDEA controls cell proliferation**

**and embryonic patterning in *Arabidopsis***

**Sara Simonini, Marian Bemer, Stefano Bencivenga, Valeria Gagliardini, Nuno D. Pires, Bénédicte Desvoyes, Eric van der Graaff, Crisanto Gutierrez, and Ueli Grossniklaus**

**Figure S1. Related to Figure 1.**

**A**

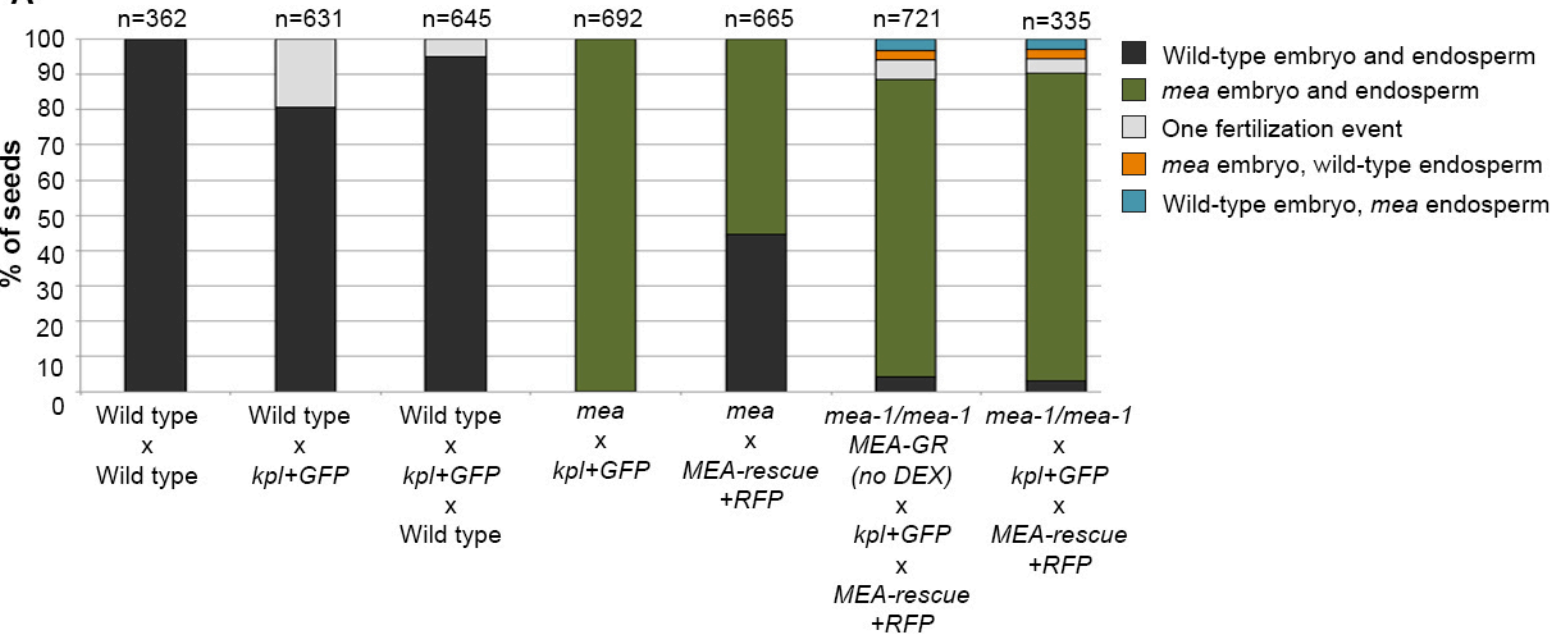

**B**

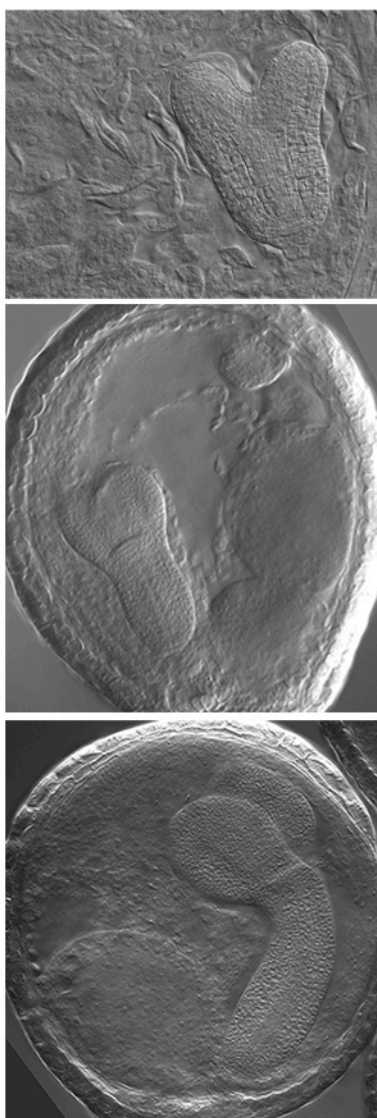

**C**

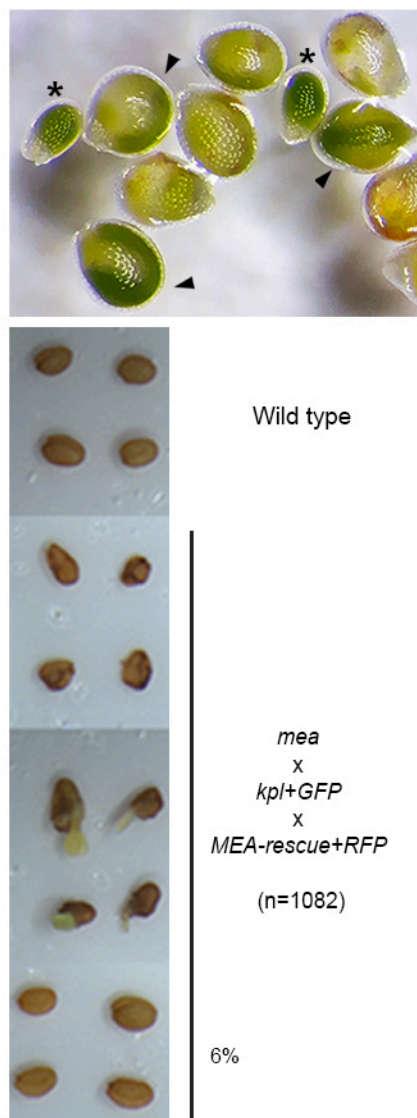

**D**

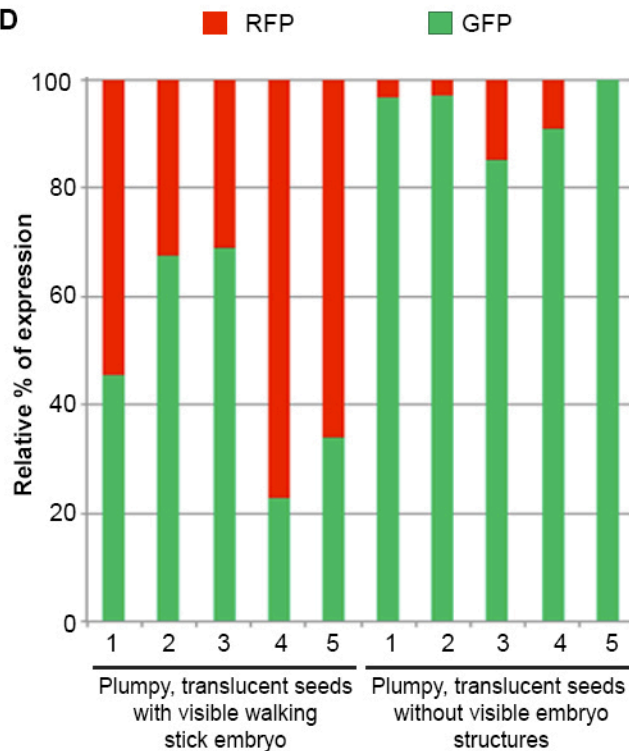

**Figure S1: Rescue of mutant *mea* embryos and genotyping of rescued and non-rescued *mea* seeds, related to Figure 1.**

**A.** Quantification of phenotypes observed in the single and double crosses.

**B.** Images of cleared seeds derived from the double pollination of *mea* pistils. Wild-type embryo is surrounded by uncellularized endosperm.

**C.** Appearance of developing seeds (top) and dried seeds (bottom) in double pollination of *mea* pistils. The developing embryo (arrow head) is visible in big and swollen seeds, a phenotype that is characteristic of *mea* seeds. Small seeds are the ones derived from full rescue by the *MEA-rescue+RFP* pollen (asterisk).

**D.** ddPCR analyses for presence of *GFP/RFP* transgenes in single seeds derived from the double pollination of *mea* pistils.

# Figure S2. Related to Figure 2.

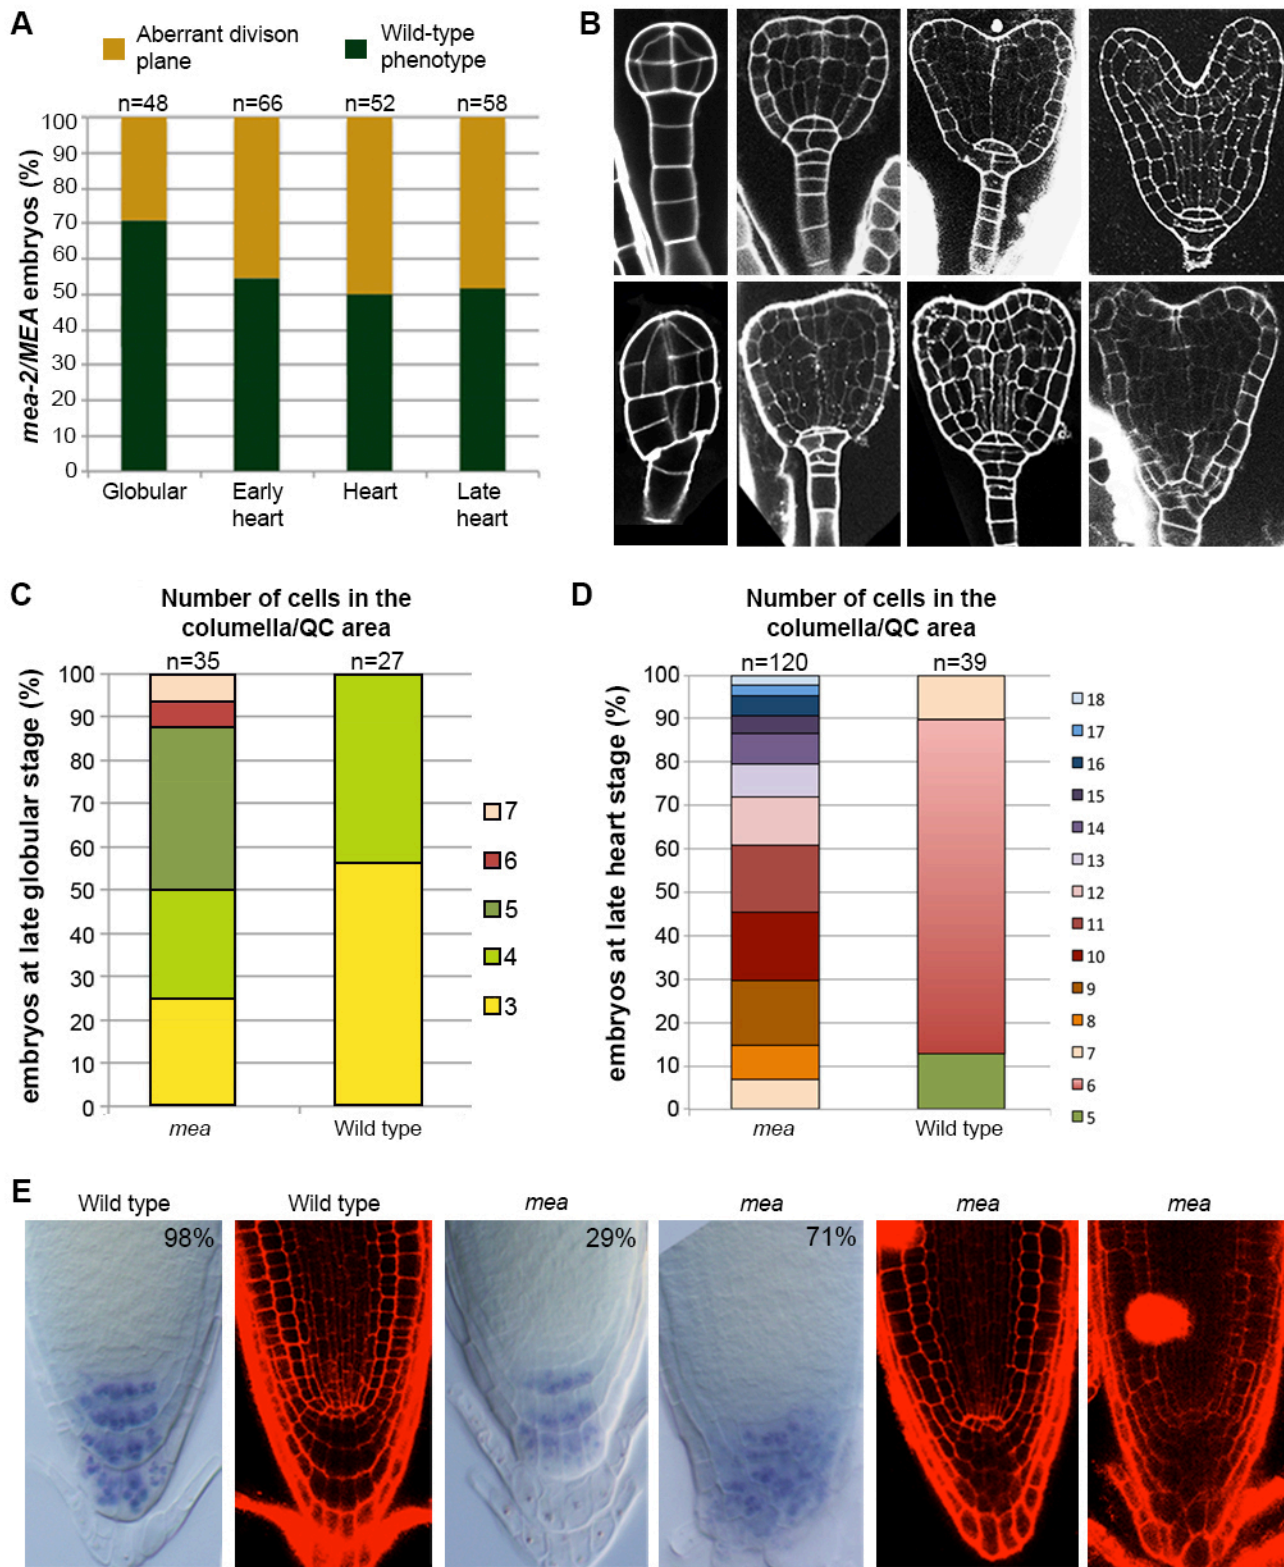

**Figure S2: Morphological defects in *mea* embryos from early globular to late heart stages and in the QC-columella area of the primary root of *mea* seedlings, related to Figure 2.**

**A.** Quantification of the number of embryos showing aberrant division planes in *mea/MEA* heterozygous offspring.  
**B.** mPS-PI staining of *mea/MEA* seeds, showing examples picture of embryos from globular (left) to late heart (right) stages.  
**C.** Quantification of the number of cells in the columella/QC area in embryos at late globular stage showing a wild-type phenotype or aberrant divisions.  
**D.** Quantification of the number of cells in the columella/QC area in embryos at late heart stage showing a wild-type or a *mea* phenotype.  
**E.** Lugol staining and Propidium Iodide staining of root tip of wild-type and *mea* homozygous seedlings. The percentage shows the frequency of the phenotype observed in the imaged seedlings (n=14).



# Figure S3. Related to Figure 3

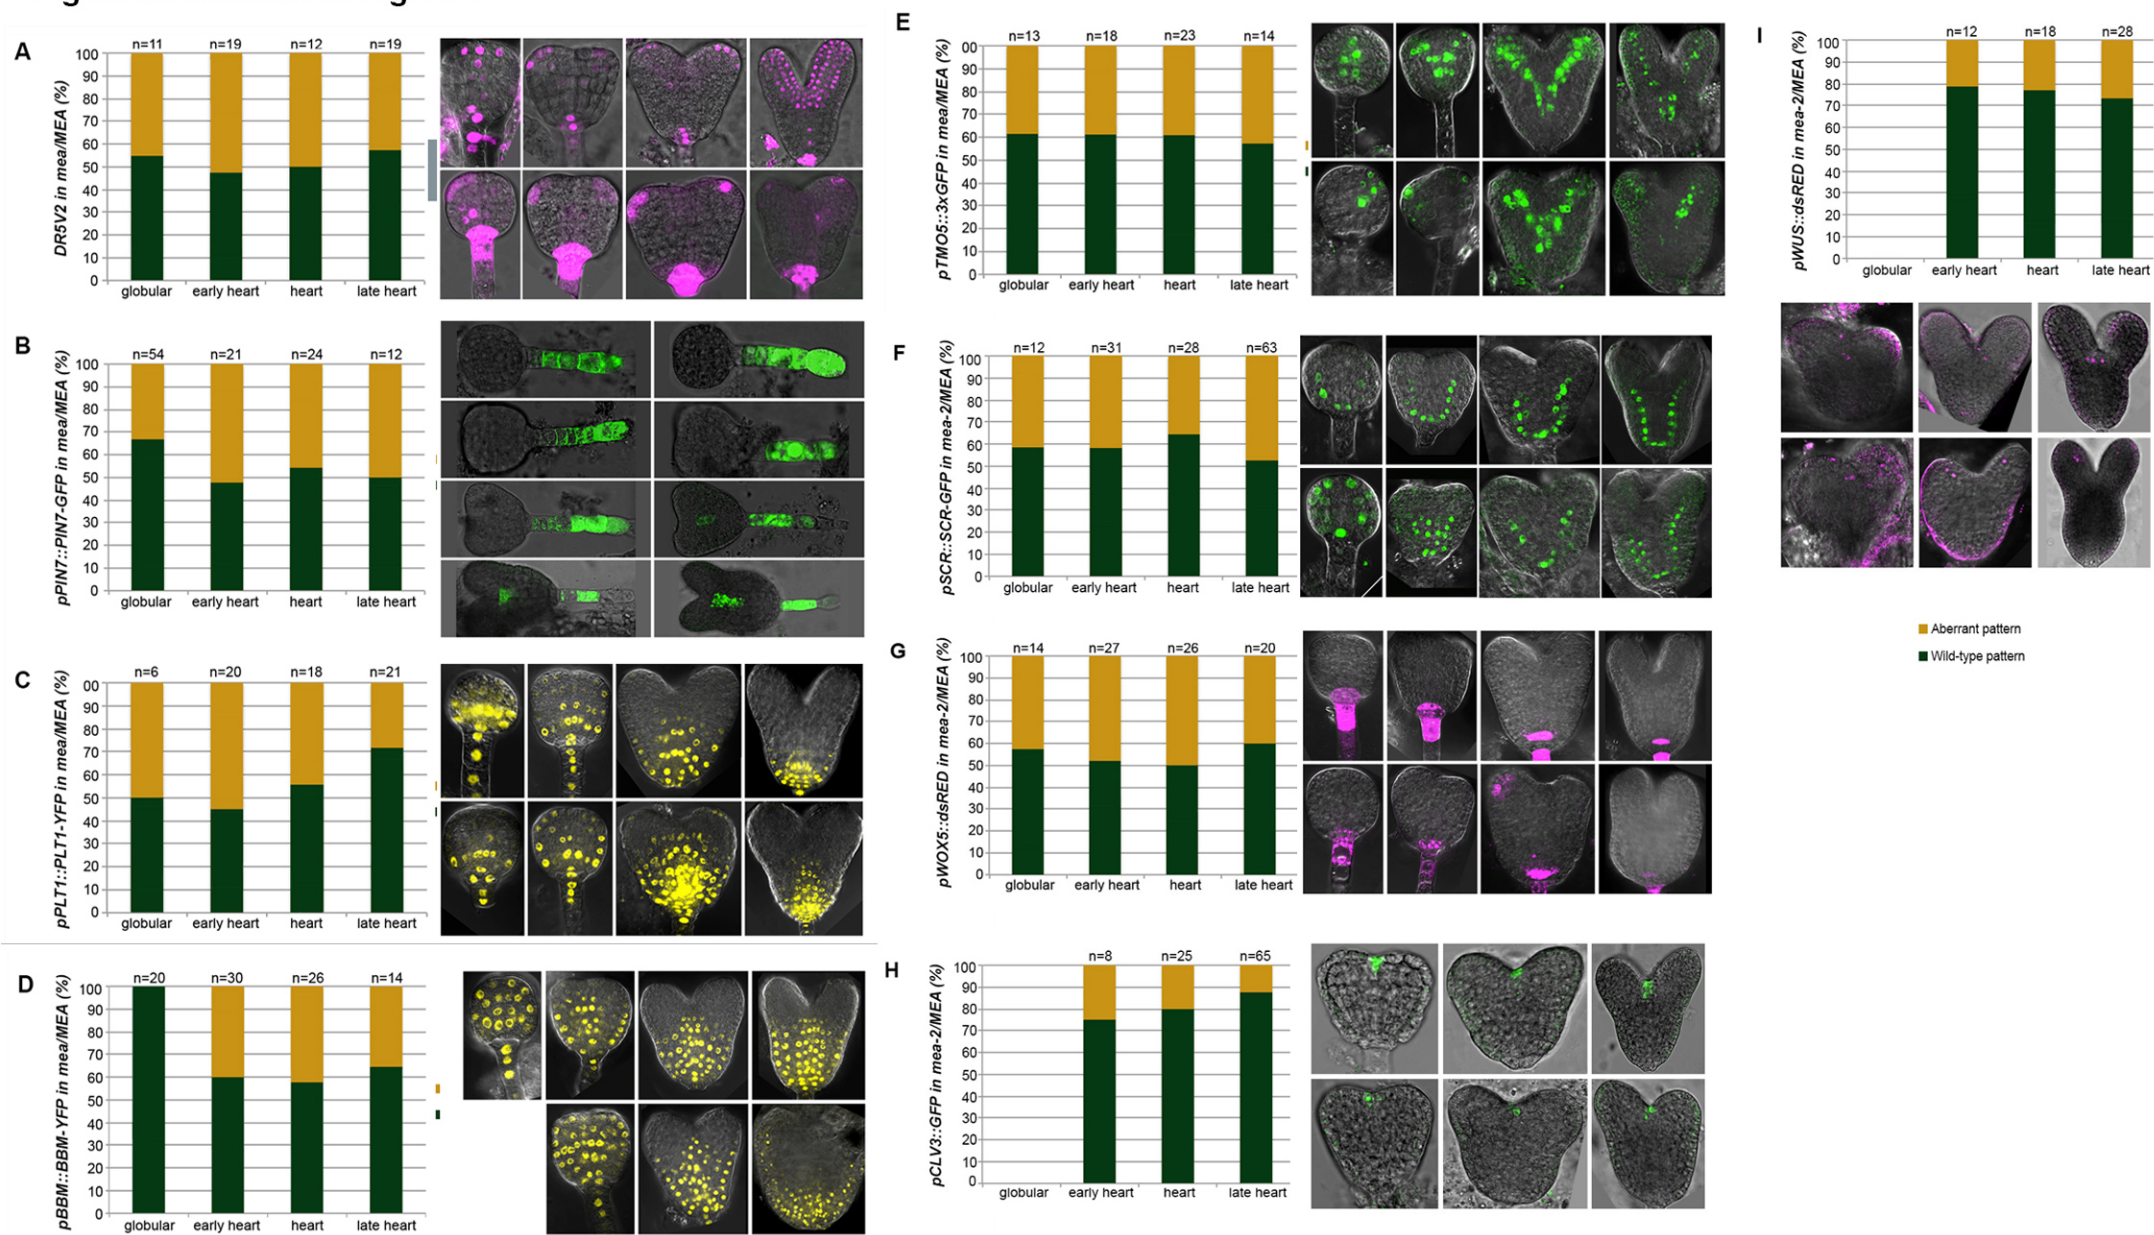

**Figure S3. Expression patterns of cell fate markers and their quantification in seeds of *mea/MEA* plants, related to Figure 3.**

For all markers, histograms of the quantification are shown on the left and pictures of representative embryos on the right; pictures show wild-type expression patterns in the top row and aberrant ones in the bottom row for all markers, except for (b) where wild-type and aberrant expression patterns are shown in the left and right panels, respectively.

- A.** Quantification of aberrant versus wild-type expression patterns in *mea/MEA DR5V2* seeds.
- B.** Quantification of aberrant versus wild-type expression patterns in *mea/MEA pPINT7::PINT7-GFP* seeds.
- C.** Quantification of aberrant versus wild-type expression patterns in *mea/MEA pPLT1::PLT1-YFP* seeds.
- D.** Quantification of aberrant versus wild-type expression patterns in *mea/MEA pBBM::BBM-YFP* seeds.
- E.** Quantification of aberrant versus wild-type expression patterns in *mea/MEA pTMO5::3xGFP* seeds.
- F.** Quantification of aberrant versus wild-type expression patterns in *mea/MEA pSCR::SCR-GFP* seeds.
- G.** Quantification of aberrant versus wild-type expression patterns in *mea/MEA pWOX5::dsRED* seeds.
- H.** Quantification of aberrant versus wild-type expression patterns in *mea/MEA pCLV3::GFP* seeds.
- I.** Quantification of aberrant versus wild-type expression patterns in *mea/MEA pWUS::dsRED* seeds.



**Figure S4. Related to Figure 5.**

**Figure S4: *CYCD1;1* expression in *mea* embryos and confocal analysis of *pCYCD1;1::NLS-3XVenus-3'UTR* in and *pCYCD1;1::CYCD1;1-GFP-3'UTR* marker lines in wild-type plants, related to Figure 5.**

**A ddPCR analysis on *CYCD1;1* expression in isolated embryos**

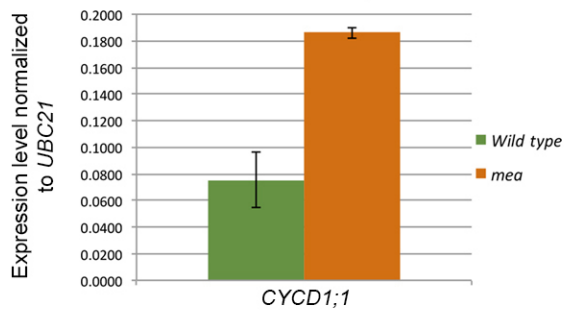

**A.** ddPCR analysis of *CYCD1;1* transcript level in wild-type versus *mea* embryos around early globular stage.

**B.** Confocal images of *pCYCD1;1::NLS-3xVenus-3'UTR* marker line showing its wild-type expression pattern in embryos from the globular to mature stages, a magnification of the root tip showing no expression in the QC, a seed showing expression only in the sporophytic tissues, the vasculature of the primary root, and two emerging lateral roots.

**C.** Confocal images of the *pCYCD1;1::CYCD1;1-GFP-3'UTR* reporter gene showing its wild-type expression pattern in embryos from the globular to heart stages, seed coat, vasculature of the primary root, and two emerging lateral roots.

**B *pCYCD1;1::NLS-3xVenus-3'UTR* (wild-type expression pattern)**

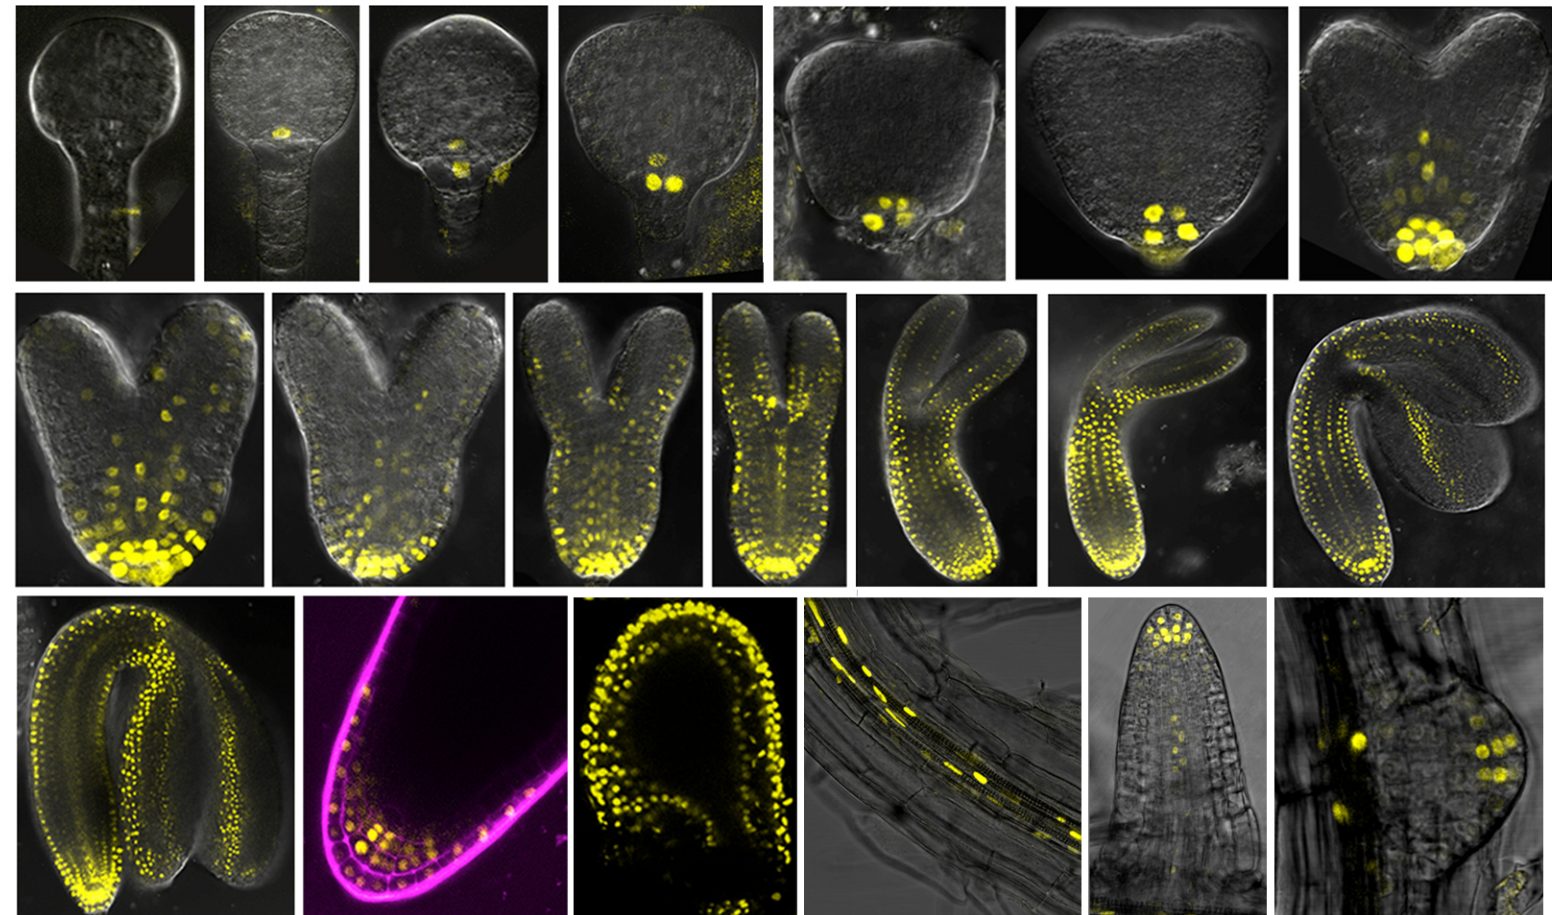

**C *pCYCD1;1::CYCD1;1-GFP-3'UTR* (wild-type expression pattern)**

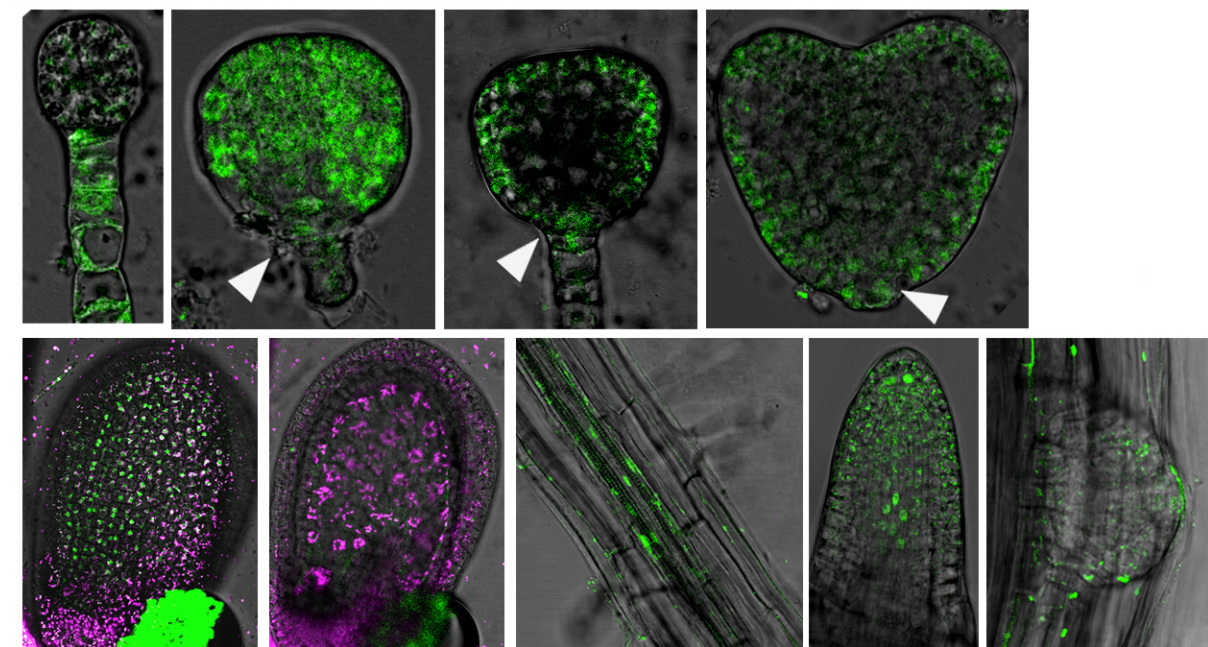



**Figure S5. Related to Figure 5.**

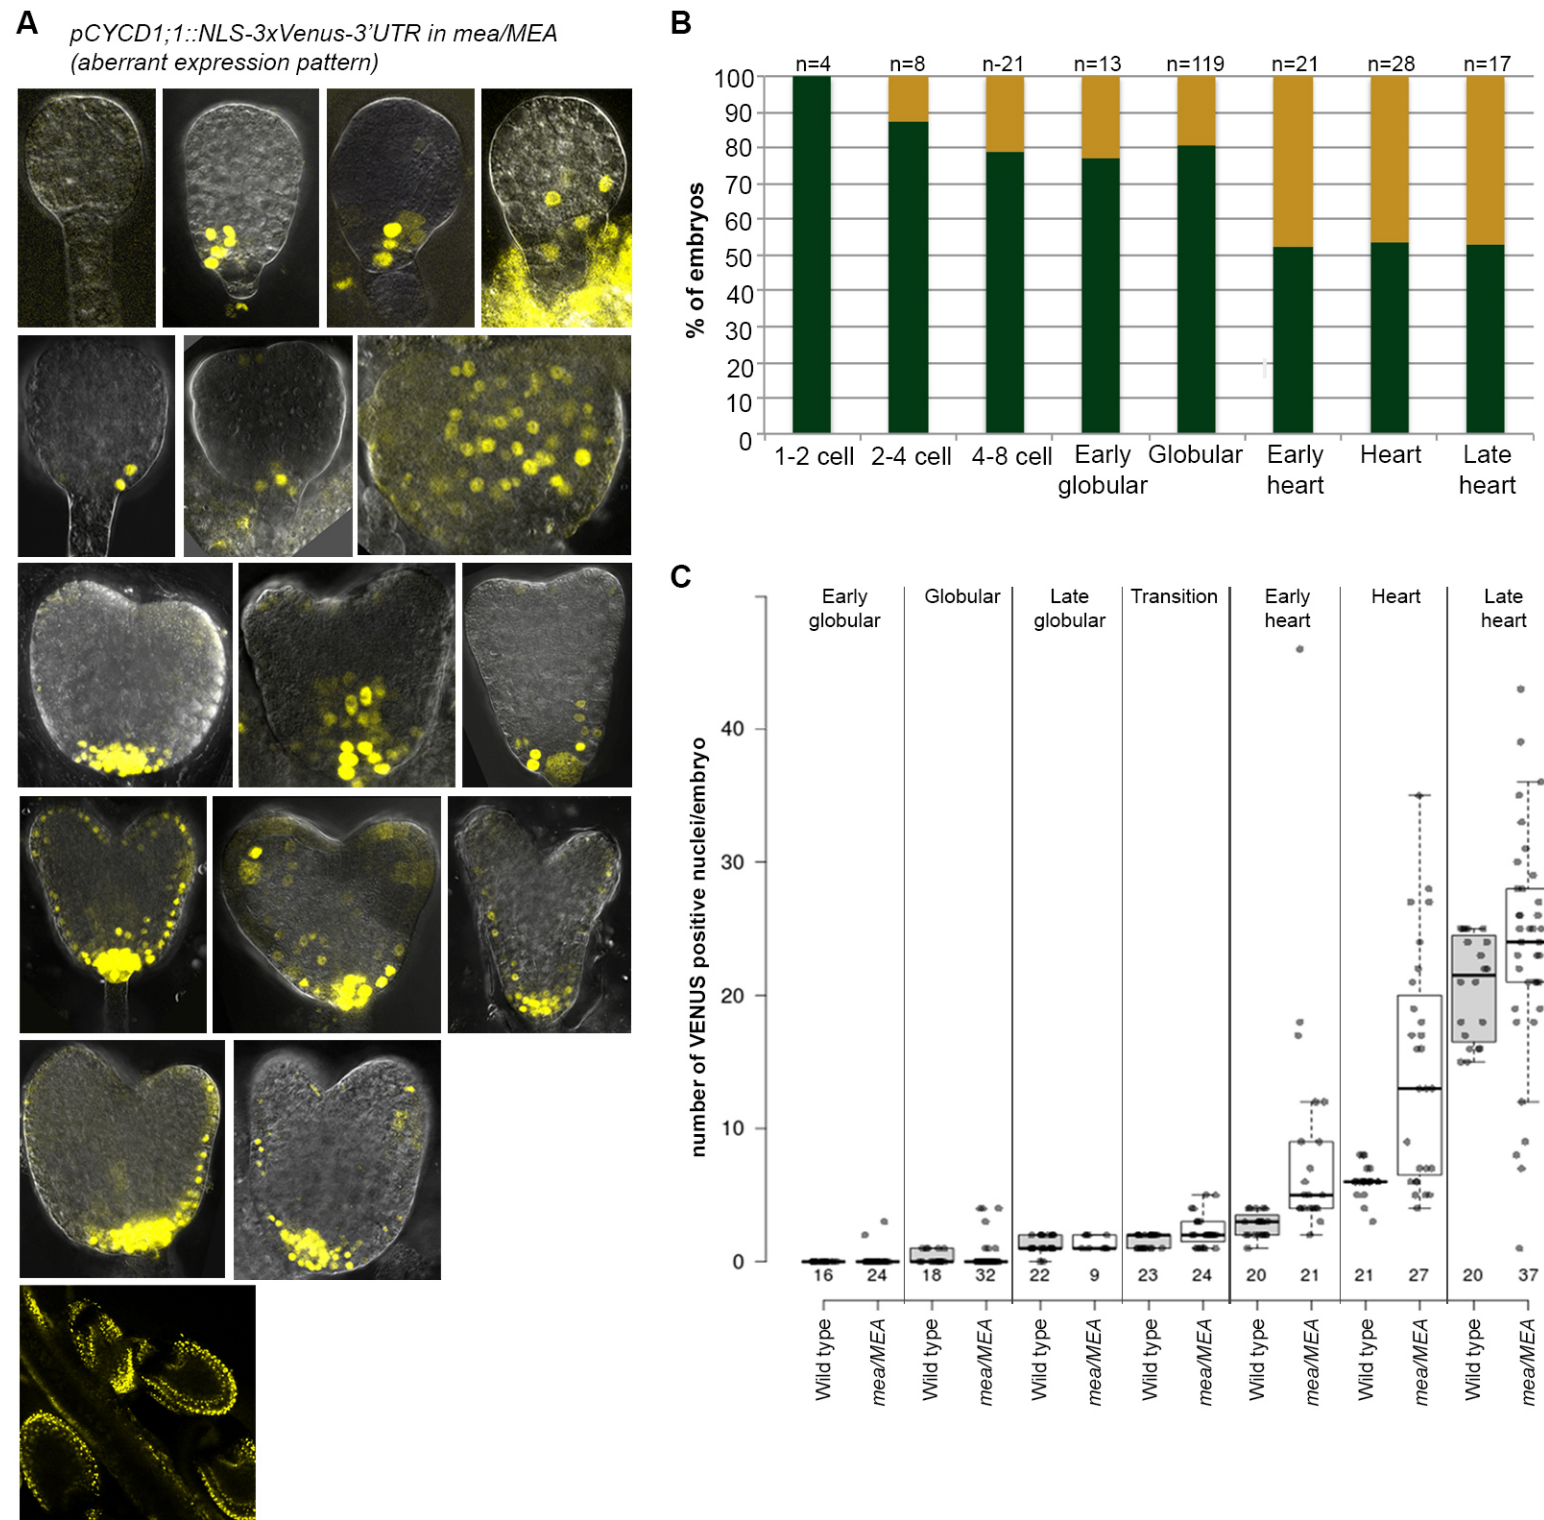

**Figure S5: Expression pattern of *pCYCD1;1::NLS-3xVenus-3'UTR* and its quantification in embryos of *mea/MEA* plants at different developmental stages, related to Figure 5.**

- A.** Confocal images of *pCYCD1;1::NLS-3xVenus-3'UTR* marker line showing aberrant expression in *mea/MEA* seeds, in embryos from the globular to late heart stages. In *mea/MEA* seeds, no expression of the marker is detected in the endosperm.
- B.** Quantification of the percentage of embryos showing an aberrant expression pattern of the *pCYCD1;1::NLS-3xVenus-3'UTR* reporter gene in the *mea/MEA* background.
- C.** Quantification of the number of nuclei expressing the *pCYCD1;1::NLS-3xVenus-3'UTR* reporter gene in embryos developing from wild-type and *mea/MEA* plants. Embryonic stages from the early globular to the late heart stage are shown.



**Figure S6. Related to Figure 5.**

**A** *mea-2 cycd1;1/cycd1;1*

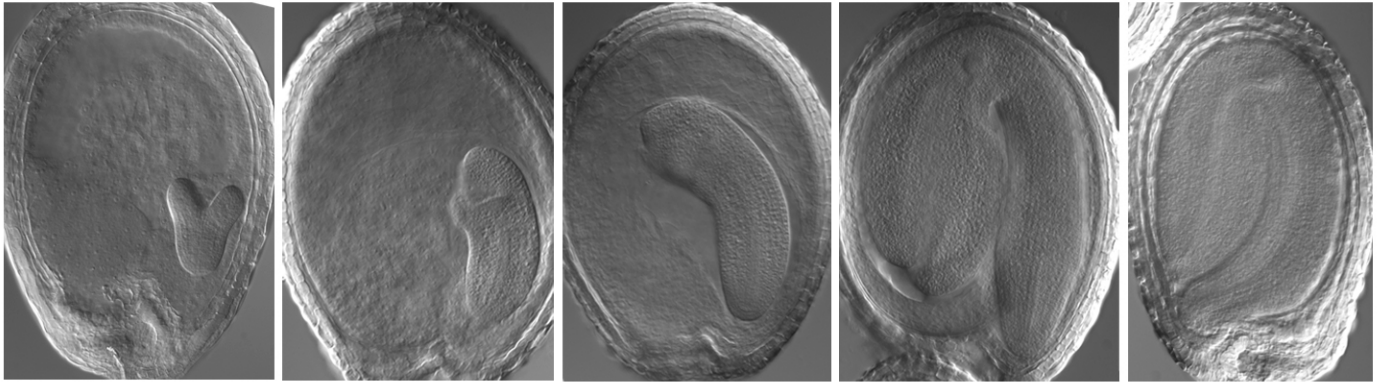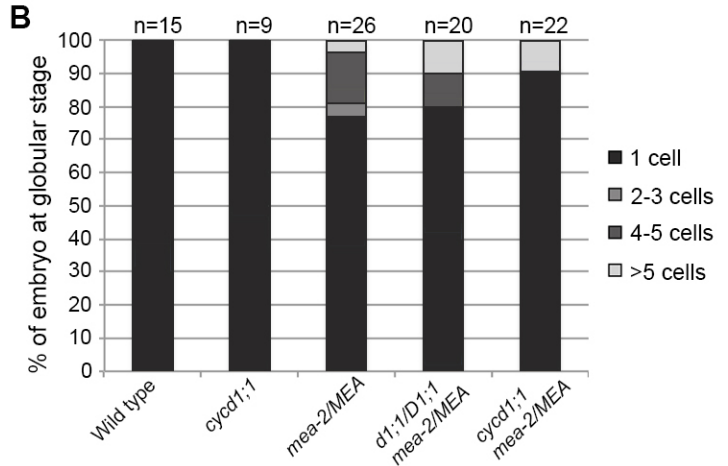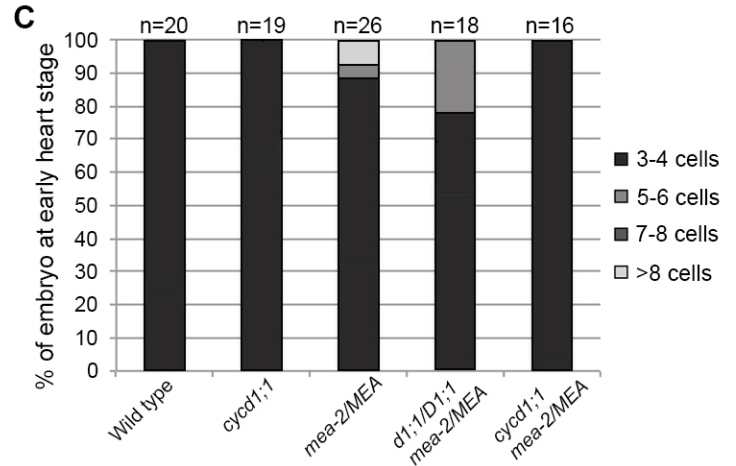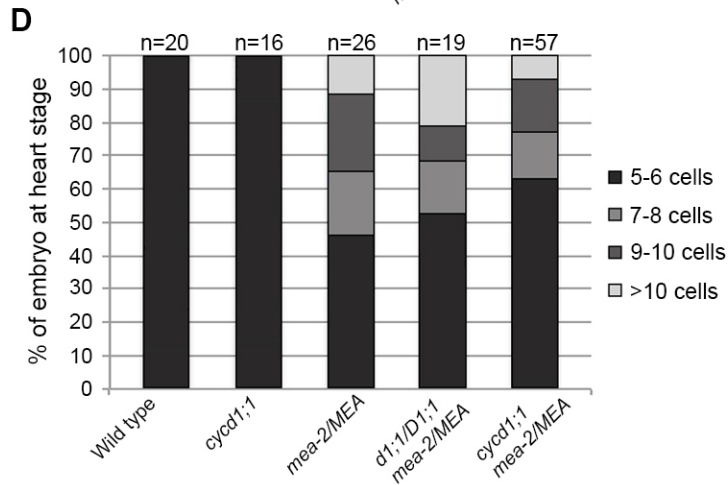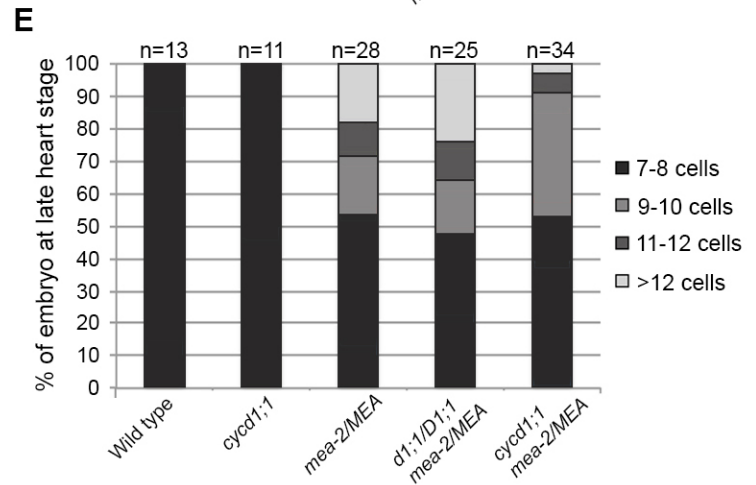

**Figure S6. Characterization of *mea cycd1;1* seeds and embryos from globular to late heart stages, related to Figure 5.**

**A.** DIC microscopy analysis of *mea cycd1;1* seeds, showing enlarged embryos surrounded by defective endosperm.

**B-E** Quantification of the number of cells in the columella/QC area in embryos at globular stage (b), early heart stage (c), heart stage (d), and late heart stage (e), of wild-type, *cycd1;1* mutant, *mea/MEA* mutant, *cycd1;1/CYCD1;1 mea/MEA* double heterozygous mutant, and *cycd1;1 mea/MEA* mutant.

**Figure S7. Related to Figure 6.**

**A** *pRPL18::NLS-3xVenus*

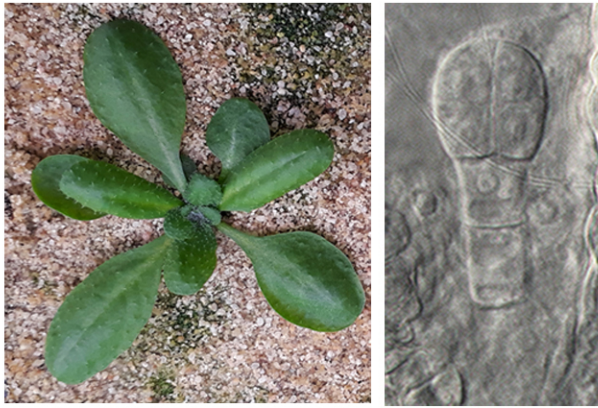

**B** *pRPL18::CYCD1;1*

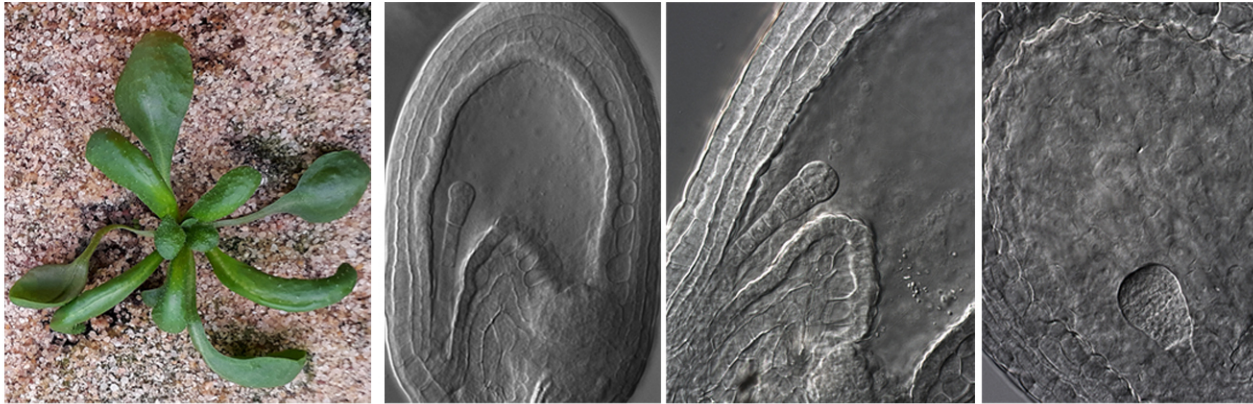

**C** *pRPL18::NLS-3xVenus*

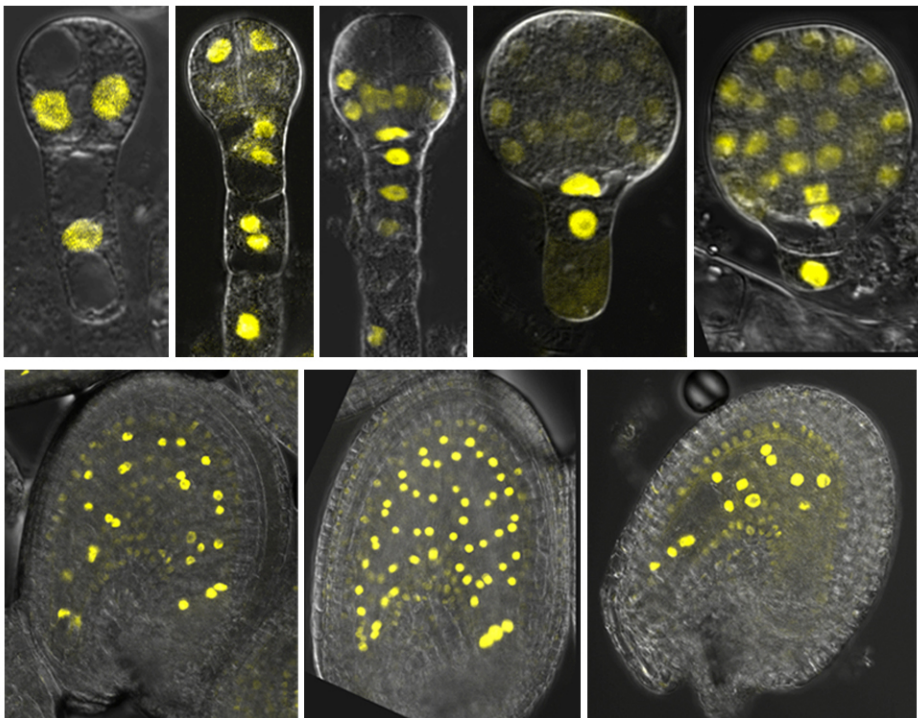

**Figure S7. Phenotypes resulting from ectopic expression of *CYCD1;1* under control of the *pRPL18* promoter and reporter gene expression controlled by the latter in embryos and seeds, related to Figure 6.**

**A.** Images of rosettes of *pRPL18::NLS-3xVenus* (left) and embryo at globular stage by DIC analysis (right).

**B.** Images of rosettes of *pRPL18::CYCD1;1* (left), and by DIC microscopic analysis of seeds (right), showing embryos with abnormal shape surrounded by normal endosperm.

**C.** Confocal imaging of the *pRPL18::3xNLS-Venus* line showing the expression pattern conferred by the *pRPL18* promoter in the developing embryo and seed.



**Supplementary Table S2.** Primers used in this study related to STAR Methods

| <b><i>pCYCD1;1::3xNLS-Venus-3'UTR</i></b>    |                                                                                                |
|----------------------------------------------|------------------------------------------------------------------------------------------------|
| <i>CYCD1;1</i> promoter                      | Fw gtggtctcaGGAGtagtcgcaacttgcaaac<br>rev gtggtctcaCATttctctcccataaccggagatg                   |
| <i>CYCD1;1</i> 3'UTR                         | Fw gtggtctcaGCTTaatttggggagtgaagtagag<br>Rev gtggtctcaAGCGgatattgaaggagtgttcaatg               |
| <b><i>pCYCD1;1::CYCD1;1-GFP-3'UTR</i></b>    |                                                                                                |
| <i>CYCD1;1</i> promoter                      | Fw gtggtctcaGGAGtagtcgcaacttgcaaac<br>Rev gtggtctcaCATttctctcccataaccggagatg                   |
| <i>CYCD1;1</i> gene                          | Fw gtggtctctaATGAGGAGTTACCGTTTTAGTG<br>Rev gtggtctcTcaccATTAGAGGTAGATGTTTCATC                  |
| <i>CYCD1;1</i> 3'UTR                         | Fw gtggtctcaGCTTaatttggggagtgaagtagag<br>Rev gtggtctcaAGCGgatattgaaggagtgttcaatg               |
| <b><i>pMEA::MEA-GFP-3'UTR</i></b>            |                                                                                                |
| <i>MEA</i> fragment 1                        | Fw ggtctcaGGAGtcaggatattgtaataataacc<br>Rev ggtctcTCACAAAATCcAGACCCTCCA                        |
| <i>MEA</i> fragment 2                        | Fw ggtctcTTGTGAACTGGTGGATGTATTAC<br>Rev ggtctcCAAACGAATGGGGAGGTTAAG                            |
| <i>MEA</i> fragment 3                        | Fw ggtctcCGTTTGGAGGGTCTgAATTTTG<br>Rev ggtctcCCATtaaccactcgcctcttc                             |
| <i>MEA</i> fragment 4                        | Fw gtggtctctaATGGAGAAGgtagtttc<br>Rev gtggtctcaaacGGGCTCATACTTCTCATGCA                         |
| GFP fusion with <i>MEA</i>                   | Fw ggtctcaggttctatggtgagcaaggcgagga<br>Rev ggtctcaggaactctgtacagctcgtccatgc                    |
| <i>MEA</i> fragment 5                        | Fw gtggtctcattccGAGTCTAGATCCgtaagcatt<br>Rev gtggtctcATGCTCACTGCATGGTTGTC                      |
| <i>MEA</i> fragment 6                        | Fw gtggtctcGAGCATTGTTACCTCAAAGtc<br>Rev GTTTGGATCTGACACCACAA                                   |
| <i>MEA</i> fragment 7                        | Fw TATCAAACAAGATTGTGGTGTC<br>Rev gtggtctcTaagCTAACGAGCTGGACGGGCTTC                             |
| <i>MEA</i> fragment 8                        | Fw gtggtctcaGCTTttgatctgaggagaagcagc<br>Rev gtggtctcAGCGattccacaatccaac                        |
| <b><i>pRPL18::CYCD1;1</i></b>                |                                                                                                |
| <i>RPL18</i> promoter                        | Fw ggtctcaGGAGattggtgatcaaagtcaataactc<br>Rev ggtctcCCATtttctgtctggagagagac                    |
| <i>CYCD1;1</i> CDS                           | Fw ggtctctaATGAGGAGTTACCGTTTTAGTG<br>Rev g ggtctcTaagCTAATTAGAGGTAGATGTTTC                     |
| <b><i>CYCD1;1 GABI_214D10 genotyping</i></b> |                                                                                                |
| Wild-type band                               | Fw ATTCATGGCCTGGTGATTCTATC<br>Rev ttacaaagtttcaataaagccga                                      |
| <b>ddPCR</b>                                 |                                                                                                |
| <i>GFP</i>                                   | Fw GCGGCACGACTTCTCAAGAG<br>Rev TCGATCCTGTTGACGAGGGT<br>5' FAM- ACGGGAACAACAAGACA –MGB 3' probe |
| <i>RFP</i>                                   | Fw GACGGCTGCCTCATCTACAAC<br>Rev CCCAGCCGAGTGTTTTCTTC<br>FAM-TGAACTTCCCATCCAAC MGB 3' probe     |
| Internal control<br>( <i>At5g62150</i> )     | Fw CAACGCTTCTAATTCGATTAGAGGT<br>Rev GGATATGCGGGTTTCGCTC<br>probe VIC ACCATCGGCGATAAAA-MGB      |
| <i>CYCD1;1</i>                               | Fw CGGGTACCTTTCTCGGGTTC<br>Rev TCGCTACACAGAGAATCGCG<br>Rev exonic GAAAGCTCGCTTCTTTATGTTGG      |
| <i>UBC21</i>                                 | Fw ATGCTTGGAGTCTGCTTGG<br>Rev TGCCATTGAATTGAACCTCTC                                            |

| <b>CUT&amp;RUN and ChIP</b> |                                                                    |
|-----------------------------|--------------------------------------------------------------------|
| Region -2693                | Fw TCAACCAAGACCAAAGTGGA<br>Rev CAAGCACTTGCATGATGAGT                |
| Region -2288                | Fw AATGACTCGACCCACTTGTT<br>Rev TAGCATAGTCAACTCGGACC                |
| Region -2149                | Fw TCAATAGGGTCCGAGTTGAC<br>Rev TTCATGGGAGCTATTGCCTT                |
| Region -1870 / Region A     | Fw AGGTTGGGAGGTGCATATTT<br>Rev TTATGGCTAGGTTGGGCTAC                |
| Region -1226                | Fw AAGGCACACGTGAAAGAAAG<br>Rev CCTTTTCGTAGAACCGGAGA                |
| Region -546                 | Fw CGACCAACAAAATGGTCCAA<br>Rev ACGTTGCATGAGTGAGTACA                |
| Region -336                 | Fw TCCTTGTTCTAACCTACGC<br>Rev CGGTTACCGTTTCCGTTATG                 |
| Region -75 / Region B       | Fw CCTTCACTCTTCTCTCCACA<br>Rev AACCGGAGCTAGATAAACCG                |
| Region 197 / Region C       | Fw TGATTTCTCGTCTTCCGAGG<br>Rev ATAGGCTCGCCTTGAGAATC                |
| Region 362                  | Fw ATTCTCAAGGCGAGCCTATT<br>Rev GCCGTTAAAGGCTGAAAGTT                |
| Region 1570                 | Fw AGAAGCGAGCTTTCTTGAGT<br>Rev GGGGATTGACAACAGAGGAT                |
| Region 1884                 | Fw AGCTTCGAGTGAGTGTAAGG<br>Rev CACCTACCCATGAATAGCCA                |
| Region 2057                 | Fw TGGGGAGTGAAAGTAGAGGA<br>Rev TTCCCCTTGGTTGGAAAAC                 |
| Region 2521                 | Fw TAATGGATCGCAGCAGTTCA<br>Rev GTCACGTGAAGTCACACACA                |
| Region 2925                 | Fw TTTGATTTTGGTGTGGCCTG<br>Rev TCCACAACACACATGTTTAC                |
| Region 3345 / Region D      | Fw CCACGAAACCATAACGTAGC<br>Rev TGGCTAATGTTTGAGGGGTT                |
| Region 3586                 | Fw CGACCAACAAAATGGTCCAA<br>Rev ACGTTGCATGAGTGAGTACA                |
| Region 4015                 | Fw ACAAAGGTTGGCATGGTTT<br>Rev AACTCCATCTGGTTCACGTT                 |
| Region 4309                 | Fw AATGACCAGCCCACACATTT<br>Rev GCTTAGGTCCTTTGTGTCC                 |
| Region 4514                 | Fw TACACGCGTTTGCCATTAGT<br>Rev TTTGTCTCTACCCATTCCCA                |
| <i>Mlu</i> -like            | Fw GATTTACAAGGAATCTGTTGGTGGT<br>Rev CATAACATAGGTTTAGAGCATCTGC      |
| <i>ME</i> A promoter        | Fw ATCGCCCAAGCTTGTGCC<br>Rev GGAGGTTAAGTCTATCCGCCGTAA              |
| <i>PHE1</i> promoter        | Fw TTGTGGTCTTTAGAATCTGATGTTTATG<br>Rev CAGTTGGATAGAAAGTAATGTTATGGC |
